# Supplementary material for: Neutralizing activity of anti–SARS-CoV-2 hyperimmune immunoglobulins and intravenous immunoglobulins against currently circulating SARS-CoV-2 variants
Source: JCI journal article supplement (doi:10.1172/jci182919), 2024-07-25
Supplement: sd1 [file 1]

1 **SUPPLEMENTAL APPENDIX**

2 **Supplement to:**

3 **Neutralizing activity of SARS-CoV-2 hyperimmune immunoglobulins and intravenous**  
4 **immunoglobulins against currently circulating SARS-CoV-2 variants**

5  
6 *by Lorenza Bellusci, Hana Golding and Surender Khurana.*

7

8

9

10

11

**TABLE OF CONTENTS**

12 **CONTENTS**

13 **1. Materials and Methods**

14 **2. Table S1.** SARS-CoV-2 variants mutations introduced in the spike plasmid for production of  
15 SARS-CoV-2 pseudovirions for analysis in PsVNA

16 **3. Table S2.** Summary of CP and IVIG lots and neutralization titers

17 **4. Acknowledgments**

18 **5. Supplementary References**

19

## 24 **MATERIALS AND METHODS**

### 25 **Sex as a biological variable**

26 Sex was not considered as a biological variable. IVIG lots were purchased from  
27 commercial manufactures who manufactured it from pooled plasma from 200-1000s of donors.  
28 Seven random CP lots were obtained from recovered COVID-19 patients between May-  
29 September 2020. Sex information was not provided by the supplier.

30

### 31 **Samples and study design**

32 IVIG products approved in the United States are polyclonal antibody preparations made  
33 from 10,000 or more U.S. plasma donors and may include cold alcohol fractionation (Cohn-  
34 Oncley), anion-exchange and size-exclusion chromatography's. The final product is sterile-  
35 filtered IgG (>95%) and formulated at 100 mg/mL. Twenty intravenous immunoglobulin batches  
36 were produced from plasma collected prior to August 2019 (2019-IVIG) and eight IVIG lots made  
37 from plasma donations in 2020 (2020-IVIG) and manufactured between October 2020 and  
38 January 2021 (each lot derived from >10,000 donors), were obtained from six manufacturers.

39 Seventeen pi-hCoV-2IG batches prepared from post-SARS-CoV-2 infection CP collected  
40 at least 30-days post-recovery (~200-1000 US plasma donors per lot) were obtained/purchased  
41 from four commercial companies for blinded antibody analysis. The plasma units used in the  
42 manufacturing of the hCoV-2IG batches were collected in 2020 (during circulation of ancestral  
43 Wuhan, D614G or alpha strains) prior to emergence of the Delta and Omicron VOCs or prior to  
44 availability of COVID-19 vaccines. Nine IVIG lots manufactured in 2023 (2023-IVIG) and five  
45 IVIG lots manufactured in 2024 (2024-IVIG) were obtained from four manufacturers. One  
46 hyperimmune intravenous immunoglobulin lot (Vx-hCoV-2IG) produced from plasma collected

47 from SARS-CoV-2 vaccinated individuals at least 2 weeks after second vaccination (most with  
48 prior COVID-19 infection) in 2021 (during the alpha and delta circulation) prior to circulation of  
49 Omicron was obtained from one manufacturer.

50 Seven random CP lots were obtained from recovered COVID-19 patients between May-  
51 September 2020 (at least 30-days post-recovery) prior to COVID-19 vaccinations. At the time of  
52 collection SARS-CoV-2 D614G was the predominant strain in the US. Eight CP lots were  
53 collected in February 2022 from recovered individuals following Omicron breakthrough infections  
54 (probably BA.1), who received at least two doses of COVID-mRNA vaccination.

55

## 56 **Neutralization assay**

57 Samples were evaluated in a qualified SARS-CoV-2 pseudovirion neutralization assay  
58 (PsVNA) using SARS-CoV-2 WA1/2020 strain and circulating Omicron subvariants: BA.2.86,  
59 XBB.1.16, XBB.2.3, EG.5, HV.1, HK.3, JN.1, JN.4 and JD.1.1. The mutations in spike protein of  
60 these Omicron subvariants are shown in Supplementary Table S1. SARS-CoV-2 neutralizing  
61 activity measured by PsVNA correlates with PRNT (plaque reduction neutralization test with  
62 authentic SARS-CoV-2 virus) in previous studies (1-3). However, some antibodies targeting the  
63 N-terminal domain of SARS-CoV-2 spike may not show neutralization in the pseudovirus  
64 neutralization assay.

65 Neutralization assays were performed as previously described (2, 4). Briefly, 50  $\mu$ L of  
66 SARS-CoV-2 S pseudovirions (counting ~200,000 relative light units) were pre-incubated with  
67 an equal volume of medium containing serial dilutions (starting at 1:10) of all samples at room  
68 temperature for 1 h. Then, 50  $\mu$ L of virus-antibody mixtures were added to 293T-ACE2-

69 TMPRSS2 cells [ $10^4$  cells/50  $\mu$ L; gift from the laboratory of Carol Weiss (1)] in a 96-well plate.  
70 The input virus with all SARS-CoV-2 strains was the same ( $2 \times 10^5$  relative light units/50  $\mu$ L/well).  
71 After a 3 h incubation, fresh medium was added to the wells. Cells were lysed 24 h later, and  
72 luciferase activity was measured using One-Glo luciferase assay system (Promega). The assay  
73 of each sample was performed in duplicate, and the 50% neutralization titer was calculated using  
74 Prism 9 (GraphPad Software). The limit of detection for the neutralization assay is 1:20. Two  
75 independent biological replicate experiments were performed for each sample and variation in  
76 PsVNA50 titers was <10% between replicates.

77

## 78 **Quantification and statistical analysis**

79 Descriptive statistics were performed to determine the geometric mean titer values and  
80 were calculated using GraphPad. All experimental data to compare differences among groups  
81 were analyzed using Ordinary one-way ANOVA with Tukey's pairwise multiple comparison test  
82 in GraphPad Prism version 9.3.1. To ensure robustness of the results, absolute measurements  
83 were log<sub>2</sub>-transformed before performing the analysis.

84

## 85 **Study approval**

86 This study was reviewed and approved by the Food and Drug Administration's Research  
87 Involving Human Subjects Committee (RIHSC #2020-04-02). This study complied with all  
88 relevant ethical regulations for work with human participants, and written informed consent was  
89 obtained. Samples were collected from adult subjects who provided informed consent to

90 participate in the study. All assays performed fell within the permissible usages in the original  
91 informed consent.

92

### 93 **Data availability**

94 All underlying data shown in the manuscript is provided in Supplementary Table S2 of the  
95 supplementary appendix.

96

97

**Supplementary Table S1: SARS-CoV-2 variants mutations introduced in the spike plasmid for production of SARS-CoV-2 pseudovirions for analysis in PsVNA.**

| SARS-CoV-2 variant | Mutations constructed in the spike plasmids                                                                                                                                                                                                                                                                                                                                           |
|--------------------|---------------------------------------------------------------------------------------------------------------------------------------------------------------------------------------------------------------------------------------------------------------------------------------------------------------------------------------------------------------------------------------|
| Omicron (BA.2.86)  | BA.2 spike mutations (T19I, delL24, delP25, delP26, A27S, G142D, V213G, G252V, G339D, S371F, S373P, S375F, T376A, D405N, R408S, K417N, N440K, S477N, T478K, E484A, Q493R, Q498R, N501Y, Y505H, D614G, H655Y, N679K, P681H, N764K, D796Y, Q954H, N969K) + D339H, K356T, A570V, V445H, R493Q, F486P                                                                                     |
| Omicron (XBB.1.16) | XBB.1.5 spike mutations (T19I, delL24, delP25, delP26, A27S, G142D, V213G, G252V, G339D, S371F, S373P, S375F, T376A, D405N, R408S, K417N, N440K, S477N, T478K, E484A, Q493R, Q498R, N501Y, Y505H, D614G, H655Y, N679K, P681H, N764K, D796Y, Q954H, N969K, V83A, Del144, H146Q, Q183E, V213E, G339H, R346T, L368I, V445P, G446S, N460K, F486P, F490S, R493Q) + E180V, K478R            |
| Omicron (XBB.2.3)  | XBB.1 spike mutations (T19I, delL24, delP25, delP26, A27S, G142D, V213G, G252V, G339D, S371F, S373P, S375F, T376A, D405N, R408S, K417N, N440K, S477N, T478K, E484A, Q493R, Q498R, N501Y, Y505H, D614G, H655Y, N679K, P681H, N764K, D796Y, Q954H, N969K, V83A, Del144, H146Q, Q183E, V213E, G339H, R346T, L368I, V445P, G446S, N460K, F486S, F490S, R493Q) + D253G, P521S              |
| Omicron (EG.5)     | XBB.1.5 spike mutations (T19I, delL24, delP25, delP26, A27S, G142D, V213G, G252V, G339D, S371F, S373P, S375F, T376A, D405N, R408S, K417N, N440K, S477N, T478K, E484A, Q493R, Q498R, N501Y, Y505H, D614G, H655Y, N679K, P681H, N764K, D796Y, Q954H, N969K, V83A, Del144, H146Q, Q183E, V213E, G339H, R346T, L368I, V445P, G446S, N460K, F486P, F490S, R493Q) + Q52H, F456L             |
| Omicron (HV.1)     | EG.5 spike mutations (T19I, delL24, delP25, delP26, A27S, G142D, V213G, G252V, G339D, S371F, S373P, S375F, T376A, D405N, R408S, K417N, N440K, S477N, T478K, E484A, Q493R, Q498R, N501Y, Y505H, D614G, H655Y, N679K, P681H, N764K, D796Y, Q954H, N969K, V83A, Del144, H146Q, Q183E, V213E, G339H, R346T, L368I, V445P, G446S, N460K, F486P, F490S, R493Q, Q52H, F456L) + L452R, F1527L |
| Omicron (HK.3)     | EG.5 spike mutations (T19I, delL24, delP25, delP26, A27S, G142D, V213G, G252V, G339D, S371F, S373P, S375F, T376A, D405N, R408S, K417N, N440K, S477N, T478K, E484A, Q493R, Q498R, N501Y, Y505H, D614G, H655Y, N679K, P681H, N764K, D796Y, Q954H, N969K, V83A, Del144, H146Q, Q183E, V213E, G339H, R346T, L368I, V445P, G446S, N460K, F486P, F490S, R493Q, Q52H, F456L) + L455F         |
| Omicron (JN.1)     | BA.2.86 mutations (T19I, delL24, delP25, delP26, A27S, G142D, V213G, G252V, G339D, S371F, S373P, S375F, T376A, D405N, R408S, K417N, N440K, S477N, T478K, E484A, Q493R, Q498R, N501Y, Y505H, D614G, H655Y, N679K, P681H, N764K, D796Y, Q954H, N969K, D339H, K356T, A570V, V445H, R493Q, F486P) + L455S                                                                                 |
| Omicron (JN.4)     | BA.2.86 mutations (T19I, delL24, delP25, delP26, A27S, G142D, V213G, G252V, G339D, S371F, S373P, S375F, T376A, D405N, R408S, K417N, N440K, S477N, T478K, E484A, Q493R, Q498R, N501Y, Y505H, D614G, H655Y, N679K, P681H, N764K, D796Y, Q954H, N969K, D339H, K356T, A570V, V445H, R493Q, F486P, L455S) + A475V                                                                          |
| Omicron (JD.1.1)   | XBB.1.5 spike mutations (T19I, delL24, delP25, delP26, A27S, G142D, V213G, G252V, G339D, S371F, S373P, S375F, T376A, D405N, R408S, K417N, N440K, S477N, T478K, E484A, Q493R, Q498R, N501Y, Y505H, D614G, H655Y, N679K, P681H, N764K, D796Y, Q954H, N969K, V83A, Del144, H146Q, Q183E, V213E, G339H, R346T, L368I, V445P, G446S, N460K, F486P, F490S, R493Q) + L455F, F456L, A475V     |

**Supplementary Table S2: Neutralization titers of convalescent plasma, IVIG and hCoV-2IG against SARS-CoV-2 variants\***

|                                                                                                                                                 | WA-1 | XBB.2.3 | EG.5 | BA.2.86 | XBB.1.16 | HV.1 | HK.3 | JN.1 | JN.4 | JD.1.1 |
|-------------------------------------------------------------------------------------------------------------------------------------------------|------|---------|------|---------|----------|------|------|------|------|--------|
| <b>IVIG batches produced in 2019 prior to COVID-19</b>                                                                                          |      |         |      |         |          |      |      |      |      |        |
| 2019-IVIG-1                                                                                                                                     | 10   | 10      | 10   | 10      | 10       | 10   | 10   | 10   | 10   | 10     |
| 2019-IVIG-2                                                                                                                                     | 10   | 10      | 10   | 10      | 10       | 10   | 10   | 10   | 10   | 10     |
| 2019-IVIG-3                                                                                                                                     | 10   | 10      | 10   | 10      | 10       | 10   | 10   | 10   | 10   | 10     |
| 2019-IVIG-4                                                                                                                                     | 10   | 10      | 10   | 10      | 33       | 10   | 10   | 10   | 10   | 10     |
| 2019-IVIG-5                                                                                                                                     | 10   | 10      | 10   | 10      | 10       | 10   | 10   | 10   | 10   | 10     |
| 2019-IVIG-6                                                                                                                                     | 10   | 10      | 10   | 10      | 10       | 10   | 10   | 10   | 10   | 10     |
| 2019-IVIG-7                                                                                                                                     | 10   | 10      | 10   | 10      | 10       | 10   | 10   | 10   | 10   | 10     |
| 2019-IVIG-8                                                                                                                                     | 10   | 10      | 10   | 10      | 10       | 10   | 10   | 10   | 10   | 10     |
| 2019-IVIG-9                                                                                                                                     | 10   | 10      | 10   | 10      | 10       | 10   | 10   | 10   | 10   | 10     |
| 2019-IVIG-10                                                                                                                                    | 10   | 10      | 10   | 10      | 10       | 10   | 10   | 10   | 10   | 10     |
| 2019-IVIG-11                                                                                                                                    | 10   | 10      | 10   | 10      | 10       | 10   | 10   | 10   | 10   | 10     |
| 2019-IVIG-12                                                                                                                                    | 10   | 10      | 10   | 17      | 10       | 10   | 10   | 10   | 10   | 10     |
| 2019-IVIG-13                                                                                                                                    | 10   | 10      | 10   | 10      | 10       | 10   | 10   | 10   | 10   | 10     |
| 2019-IVIG-14                                                                                                                                    | 10   | 10      | 10   | 18      | 10       | 10   | 10   | 10   | 10   | 10     |
| 2019-IVIG-15                                                                                                                                    | 10   | 10      | 10   | 10      | 10       | 10   | 10   | 10   | 10   | 10     |
| 2019-IVIG-16                                                                                                                                    | 10   | 10      | 10   | 10      | 10       | 10   | 10   | 10   | 10   | 10     |
| 2019-IVIG-17                                                                                                                                    | 10   | 10      | 10   | 10      | 10       | 10   | 10   | 10   | 10   | 10     |
| 2019-IVIG-18                                                                                                                                    | 10   | 10      | 10   | 10      | 10       | 10   | 10   | 10   | 11   | 10     |
| 2019-IVIG-19                                                                                                                                    | 10   | 10      | 10   | 10      | 10       | 10   | 10   | 10   | 10   | 10     |
| 2019-IVIG-20                                                                                                                                    | 10   | 10      | 10   | 10      | 10       | 10   | 10   | 10   | 10   | 10     |
| <b>IVIG batches produced in 2020 (circulating SARS-CoV-2 strains: Wuhan, D614G, and Alpha)</b>                                                  |      |         |      |         |          |      |      |      |      |        |
| 2020-IVIG-1                                                                                                                                     | 36   | 10      | 10   | 10      | 10       | 10   | 10   | 10   | 10   | 10     |
| 2020-IVIG-2                                                                                                                                     | 32   | 10      | 10   | 10      | 10       | 10   | 10   | 10   | 11   | 10     |
| 2020-IVIG-3                                                                                                                                     | 70   | 10      | 10   | 10      | 30       | 10   | 10   | 10   | 10   | 10     |
| 2020-IVIG-4                                                                                                                                     | 43   | 10      | 10   | 10      | 10       | 10   | 10   | 10   | 16   | 10     |
| 2020-IVIG-5                                                                                                                                     | 53   | 10      | 10   | 10      | 10       | 10   | 10   | 10   | 10   | 10     |
| 2020-IVIG-6                                                                                                                                     | 43   | 10      | 10   | 10      | 10       | 10   | 10   | 10   | 10   | 10     |
| 2020-IVIG-7                                                                                                                                     | 29   | 10      | 10   | 10      | 10       | 10   | 10   | 10   | 10   | 10     |
| 2020-IVIG-8                                                                                                                                     | 23   | 10      | 10   | 10      | 10       | 10   | 10   | 19   | 10   | 10     |
| <b>Convalescent plasma batches produced from COVID-19 survivors collected in 2020 (circulating SARS-CoV-2 strains: Wuhan, D614G, and Alpha)</b> |      |         |      |         |          |      |      |      |      |        |
| 2020-CP-1                                                                                                                                       | 333  | 10      | 10   | 10      | 10       | 10   | 10   | 19   | 10   | 10     |
| 2020-CP-2                                                                                                                                       | 101  | 10      | 10   | 10      | 10       | 10   | 10   | 10   | 10   | 10     |
| 2020-CP-3                                                                                                                                       | 10   | 10      | 10   | 10      | 10       | 10   | 10   | 10   | 18   | 10     |
| 2020-CP-4                                                                                                                                       | 79   | 10      | 10   | 10      | 10       | 10   | 10   | 10   | 10   | 10     |
| 2020-CP-5                                                                                                                                       | 44   | 23      | 25   | 25      | 28       | 10   | 10   | 10   | 20   | 10     |
| 2020-CP-6                                                                                                                                       | 73   | 10      | 10   | 10      | 10       | 10   | 10   | 20   | 19   | 10     |
| 2020-CP-7                                                                                                                                       | 473  | 10      | 10   | 10      | 10       | 10   | 10   | 10   | 10   | 10     |
| <b>Convalescent plasma batches produced from COVID-19 survivors collected in 2022 (circulating SARS-CoV-2 strains: Omicron BA.1 and BA.2)</b>   |      |         |      |         |          |      |      |      |      |        |
| 2022-CP-1                                                                                                                                       | 2419 | 62      | 24   | 76      | 73       | 29   | 21   | 20   | 26   | 21     |





|             |       |      |      |       |       |     |     |     |      |     |
|-------------|-------|------|------|-------|-------|-----|-----|-----|------|-----|
| Vx-hCoV-2IG | 69551 | 9826 | 8519 | 11415 | 11237 | 388 | 843 | 785 | 1097 | 409 |
|-------------|-------|------|------|-------|-------|-----|-----|-----|------|-----|

\* PsVNA titer Cut-off value: 1:10.

## Author contributions

SK and HG designed the research. HG provided clinical specimens and unblinded the clinical data. LB and SK performed assays. SK and HG contributed to writing the manuscript. SK had full access to all the data in the study and takes responsibility for the integrity of the data and the accuracy of the data analysis.

## Acknowledgments

We thank Basil Golding and Keith Peden at FDA for review of the manuscript. We thank Carol Weiss (FDA) for providing plasmid clones expressing SARS-CoV-2 spike variants.

## Supplementary References

1. Neerukonda SN, Vassell R, Herrup R, Liu S, Wang T, Takeda K, et al. Establishment of a well-characterized SARS-CoV-2 lentiviral pseudovirus neutralization assay using 293T cells with stable expression of ACE2 and TMPRSS2. *PLoS One*. 2021;16(3):e0248348.
2. Tang J, Lee Y, Ravichandran S, Grubbs G, Huang C, Stauff CB, et al. Epitope diversity of SARS-CoV-2 hyperimmune intravenous human immunoglobulins and neutralization of variants of concern. *iScience*. 2021:103006.
3. Ravichandran S, Coyle EM, Klenow L, Tang J, Grubbs G, Liu S, et al. Antibody signature induced by SARS-CoV-2 spike protein immunogens in rabbits. *Sci Transl Med*. 2020;12(550):eabc3539.
4. Ravichandran S, Lee Y, Grubbs G, Coyle EM, Klenow L, Akasaka O, et al. Longitudinal antibody repertoire in "mild" versus "severe" COVID-19 patients reveals immune markers associated with disease severity and resolution. *Sci Adv*. 2021;7(10).
